# Supplementary material for: Transcriptome-Based Identification and Expression Profiling of AP2/ERF Members in Caragana Intermedia and Functional Analysis of CiDREB3
Source: Research Square preprint supplement (doi:10.21203/rs.3.rs-734745/v1), 2021-08-09
Supplement: Supplementary file 1 [file e21bc64ec9a8e48a6da0f131.docx]

Supplemental Table S1 The primer sequences and usage in the study

| Primer name | Usage | Sequence (5’-3’) |
| --- | --- | --- |
| CiERF008-5’ | 5’RACE | CACCGACCTCAGCGGCTTTCTTCC |
| CiERF004-3’ | 3’RACE | GGTGAACGGCAACGATAACGGTAAGG |
| F-CiDREB1C | ORF verification | ATGCAGAAAATACAGAAACGAAG |
| R-CiDREB1C | ORF verification | TCAATGTTCCCATAGAGTCAAGT |
| F-CiDREB1D | ORF verification | ATGTTTACCGTGAAGAATATTTC |
| R-CiDREB1D | ORF verification | TTAAATTGAATAACTCCACAACG |
| F-CiDREB1F | ORF verification | GTAACAATGGACTTTGAAAAGGAAT |
| R-CiDREB1F | ORF verification | TATATGATCGGGCTACAGAATGAA |
| F-CiDREB2C | ORF verification | AGGTGCAAGAACACTGGTGAAA |
| R-CiDREB2C | ORF verification | CTAAAAGGACAACAAACCCAAGAC |
| F-CiDREB2D | ORF verification | ATGAAGACTAATACTGCTTCTGGAG |
| R-CiDREB2D | ORF verification | AAGGAACTCTAAGACCCTATATGTG |
| F-CiDREB3 | ORF verification | TAACTCACAATGACAGTAACAACAA |
| R-CiDREB3 | ORF verification | AACACGGTTCAATCCCAAAT |
| F-CiERF021 | ORF verification | GCAGAGCAGTGCATGGACAT |
| R-CiERF021 | ORF verification | TACTATACGTTAAGGATCCCAAAGG |
| F-CiERF008 | ORF verification | TTTCAATTCTCACAAAGACTCATTCC |
| R-CiERF008 | ORF verification | TCCCTGTCCCAGTCACAATCC |
| F-CiERF017 | ORF verification | ATGGTGAAGCCGAACATGGAA |
| R-CiERF017 | ORF verification | TTATTGAATTCTATCGAACCCTATTACTACT |
| F-CiERF020 | ORF verification | ACCGCACAGGGAGCCACTA |
| R-CiERF020 | ORF verification | TCTAAATCTAACACATACCTAAAAAATCACT |
| F-CiRAP2-1 | ORF verification | GATATAGGTAGCTAGGTATTTGCTTTA |
| R-CiRAP2-1 | ORF verification | TTATGGATGTAGACCAGAGACAGA |
| F-CiERF061 | ORF verification | ATCATGGACGGAATGCAAAA |
| R-CiERF061 | ORF verification | TCTAAACAGCCAGAACTTCCC |
| F-CiERF004 | ORF verification | GTTACGTTGTTGTTATCATGTCGCC |
| R-CiERF004 | ORF verification | TGTTGAAACGGTCAAGGCATCTC |
| F-CiERF009 | ORF verification | CGCAGCAAGGTACACACCACTA |
| R-CiERF009 | ORF verification | AAAAACAGTAAACTCCTCCTTCCTT |
| F-CiERF1A | ORF verification | AAACACGACATGTACGGCCAG |
| R-CiERF1A | ORF verification | TCACGCACTAAGAGACCAATAACTG |
| F-CiERF1B | ORF verification | TACTCTCTCTCGCACACACGCA |
| R-CiERF1B | ORF verification | GGCTCAATAATTTGATTCACCAACTA |
| F-CiERF003 | ORF verification | CATGGTTTTACGCTCACAAACT |
| R-CiERF003 | ORF verification | TTGATCTGATCTCATATCTAGTACAGTATT |
| F-CiERF005 | ORF verification | AACCATTCTATCAATCAACTTACTACTA |
| R-CiERF005 | ORF verification | AAAAGCAGCCCTAAATTAGAAAT |
| F-CiERF013 | ORF verification | CTTTCAGTTTCAGGTTGTTCCA |
| R-CiERF013 | ORF verification | TTACAAAATGAATAAAAAAACAGAAAT |
| F-CiERF098 | ORF verification | TTCAGAGTAAAGCAAACAGAGAGAC |
| R-CiERF098 | ORF verification | CGTTATCCACTAATGGTGTTGTCT |
| F-CiERF109 | ORF verification | ATGTCCTGCTCCTCCTTCTCCC |
| R-CiERF109 | ORF verification | TAATAAACACACACTACCGAAAATAACTACTT |
| F-CiRAV1 | ORF verification | TCTCTTCTTTGCCCCATACAAC |
| R-CiRAV1 | ORF verification | CCATTTCTTCCTTTCATCAGTCA |
| qCiEF1α-F | Real-time PCR | TGGGTGGGACATTCTCTGATT |
| qCiEF1α-R | Real-time PCR | GCACGGTTCACTTCTTCTTAGC |
| qAtEF1α-F | Real-time PCR | AGAAGGGTGCCAAATGATGAG |
| qAtEF1α-R | Real-time PCR | GGAGGGAGAGAGAAAGTCACAGA |
| qCiDREB1C-F | Real-time PCR | TCTGGCTTGGAACATTTTCTAACC |
| qCiDREB1C-R | Real-time PCR | CCTCACAATCTCCTCCTCACTGG |
| qCiDREB1D-F | Real-time PCR | GGAACCAAACAAGAAGACCAGGA |
| qCiDREB1D-R | Real-time PCR | CGCCGAGGACGACTCACTATC |
| qCiDREB1E-F | Real-time PCR | CCTCAACTTCGCTGACTCGG |
| qCiDREB1E-R | Real-time PCR | ACGCTAACGCCA TTATCGCT |
| qCiDREB1F-F | Real-time PCR | AGGGGTGCTTGAGGGTGATG |
| qCiDREB1F-R | Real-time PCR | TCCCAATCCAATGCTCTCTTCA |
| qCiDREB2C-F | Real-time PCR | GATTACTTGAAGAACTTTTCCACGG |
| qCiDREB2C-R | Real-time PCR | TTCCCCTCCTCCATTCCCAG |
| qCiDREB2D-F | Real-time PCR | GCAAAGGGGTCAAGAAAAGG |
| qCiDREB2D-R | Real-time PCR | GAAAGTTCAAACGGGCACAA |
| qCiDREB3-F | Real-time PCR | CAACTGGGGCAAATGGGTA |
| qCiDREB3-R | Real-time PCR | TAATGGTGAGAGCGGCGAC |
| qCiERF021-F | Real-time PCR | CCCCTATGGATTCTCCTCCTACG |
| qCiERF021-R | Real-time PCR | TCCTCCCACTCGTTATCCTCAA |
| qCiTINY-F | Real-time PCR | TTCAAGCCGCCGCTATCAAAG |
| qCiTINY-R | Real-time PCR | GGTCAAAAAACACGAACTCGCTATT |
| qCiTINY2-F | Real-time PCR | GGCAAATGGGTGTCCGAAA |
| qCiTINY2-R | Real-time PCR | GGTGAGCGTAACAGGTGAGGGT |
| qCiERF008-F | Real-time PCR | GGAAGAAAGCCGCTGAGGTC |
| qCiERF008-R | Real-time PCR | CTGTCCCAGTCACAATCCGAAT |
| qCiERF017-1-F | Real-time PCR | CCGAAATCAGACTACCCAACAGC |
| qCiERF017-1-R | Real-time PCR | GCAACATTATCCCCTCCGAAGA |
| qCiERF017-2-F | Real-time PCR | TCCTCACCATTCCCTTACTCCAC |
| qCiERF017-2-R | Real-time PCR | CCGTCCCCATTGTTGTTATCC |
| qCiERF020-F | Real-time PCR | ATGATAATGTCTCCGAGGTCTGTTC |
| qCiERF020-R | Real-time PCR | CGTGAGTTTCTTCTGTTTCTGCC |
| qCiRAP2-1-F | Real-time PCR | AAGTGGGGAAAGTGGGTTGC |
| qCiRAP2-1-R | Real-time PCR | CGTATTGAATCGGCGGACAT |
| qCiERF054-F | Real-time PCR | ATTGGGGAAAATGGGTGGC |
| qCiERF054-R | Real-time PCR | GTGACTTGAAGGAGAAGAAACAGATG |
| qCiERF061-F | Real-time PCR | GTGGGAACACAAAAAGCGGG |
| qCiERF061-R | Real-time PCR | GGAAACTGTCGGCGAAACTGA |
| qCiERF004-F | Real-time PCR | TGTCGCCCAGGGATAAGAACG |
| qCiERF004-R | Real-time PCR | TTCCTCACTCCCCGAAAATGC |
| qCiERF009-F | Real-time PCR | TTCAGGGGTGTGAGGAAGAGG |
| qCiERF009-R | Real-time PCR | AACGGGAAGCGGTCCATAA |
| qCiRAP2.11-F | Real-time PCR | GAACCTATGACACTCCAGAAGATGC |
| qCiRAP2.11-R | Real-time PCR | GAACCTCCAAACTACTCCTACGATG |
| qCiRAP2.12-F | Real-time PCR | CCTGTGGCAGTCAAAAGGAATG |
| qCiRAP2.12-R | Real-time PCR | GAAGGTTCCAAGCCAGACACG |
| qCiERF1A-F | Real-time PCR | TTTGGACTCTATTCGCCGCC |
| qCiERF1A-R | Real-time PCR | CCGACAAGATGCTTTTGGGTG |
| qCiERF1B-F | Real-time PCR | GAAAACGACCCAGAAGAGATGC |
| qCiERF1B-R | Real-time PCR | TGCTTCGGCACTATCAAATGTT |
| qCiERF002-F | Real-time PCR | ACGCCGCTTTGGCTTACG |
| qCiERF002-R | Real-time PCR | CCGACGATGACGACCGCT |
| qCiERF003-F | Real-time PCR | GCCGACCTTGGGGGAAATA |
| qCiERF003-R | Real-time PCR | GCTCTTTGTGCTTTCTGATTGGG |
| qCiERF005-F | Real-time PCR | AACCGCCTCAACCAACCGT |
| qCiERF005-R | Real-time PCR | CGAACCCCTCTGTAGTGCTGCT |
| qCiERF013-1-F | Real-time PCR | GAGGACGATGCCGACGACA |
| qCiERF013-1-R | Real-time PCR | GCCTTCTCCGAACTCCACGAT |
| qCiERF013-2-F | Real-time PCR | TTTCCCCATTTGATTGGTTCTG |
| qCiERF013-2-R | Real-time PCR | CACTGACTCGGCTCATTTTCCT |
| qCiERF098-F | Real-time PCR | GGTAAGTTTGCGGCAGAGATTC |
| qCiERF098-R | Real-time PCR | GCAGAGTGAGGGGCATAGGTAA |
| qCiERF109-F | Real-time PCR | GCAAGAACTCTCCGTCATCGTC |
| qCiERF109-R | Real-time PCR | TCTCTGCCTCACTCCCCTGTAT |
| qCiERF110-F | Real-time PCR | CAAGAGTAACGGGAGAAATGGGAA |
| qCiERF110-R | Real-time PCR | CCTCGCTGCTTTGAATGGGT |
| qCiERF112-F | Real-time PCR | TGGCTTGGAACATTTGACACAG |
| qCiERF112-R | Real-time PCR | TGGCGGGAAAGGAATGAAGT |
| qCiERF114-1-F | Real-time PCR | TTGTCCTCCTGTTGTTTCGGC |
| qCiERF114-1-R | Real-time PCR | CGCTTTCTTCTTGTGATGCTGG |
| qCiERF114-2-F | Real-time PCR | CCAATGTCTTCATCTTATGGTGCC |
| qCiERF114-2-R | Real-time PCR | CAGGTTCTTCTATTTGATTCGGTTC |
| qCiRAV1-F | Real-time PCR | GAAAACAGTTACGCCGAGTGACG |
| qCiRAV1-R | Real-time PCR | CCTGAAGAACCGAACCGCAT |
